# Supplementary material for: Near-infrared light-emitting electrochemical cells based on the excimer emission of a cationic iridium complex
Source: Royal Society of Chemistry journal article supplement (doi:10.1039/d0tc02805c), 2020-01-01
Supplement: d0tc02805c1.pdf [file d0tc02805c1.pdf]

**Near-infrared light-emitting electrochemical cells based on excimer emission of a  
cationic iridium complex**

You-Xuan Liu,<sup>a+</sup> Rong-Huei Yi,<sup>b+</sup> Chien-Hsiang Lin,<sup>b</sup> Zu-Po Yang,<sup>c</sup> Chin-Wei Lu,<sup>b,\*</sup>  
and Hai-Ching Su<sup>a,\*</sup>

<sup>a</sup> *Institute of Lighting and Energy Photonics, National Chiao Tung University, Tainan  
71150, Taiwan*

<sup>b</sup> *Department of Applied Chemistry, Providence University, Taichung 43301, Taiwan*

<sup>c</sup> *Institute of Photonic System, National Chiao Tung University, Tainan 71150, Taiwan*

<sup>+</sup> *Equal contribution*

To whom to correspond:

E-mail: haichingsu@mail.nctu.edu.tw; Tel: 886-6-3032121-57792

E-mail: cwlu@pu.edu.tw; Tel: 886-4-26328001-15213

**Contents**

|                                                                                        |     |
|----------------------------------------------------------------------------------------|-----|
| 1. Crystal data                                                                        | S2  |
| 2. <sup>1</sup> H, <sup>13</sup> C and <sup>1</sup> H- <sup>1</sup> H COSY NMR spectra | S4  |
| 3. Mass spectra                                                                        | S5  |
| 4. Theoretical calculation                                                             | S6  |
| 5. Excited-state lifetimes of thin films                                               | S8  |
| 6. Structure and UV/PL spectra of complex <b>RED</b> for comparison                    | S10 |

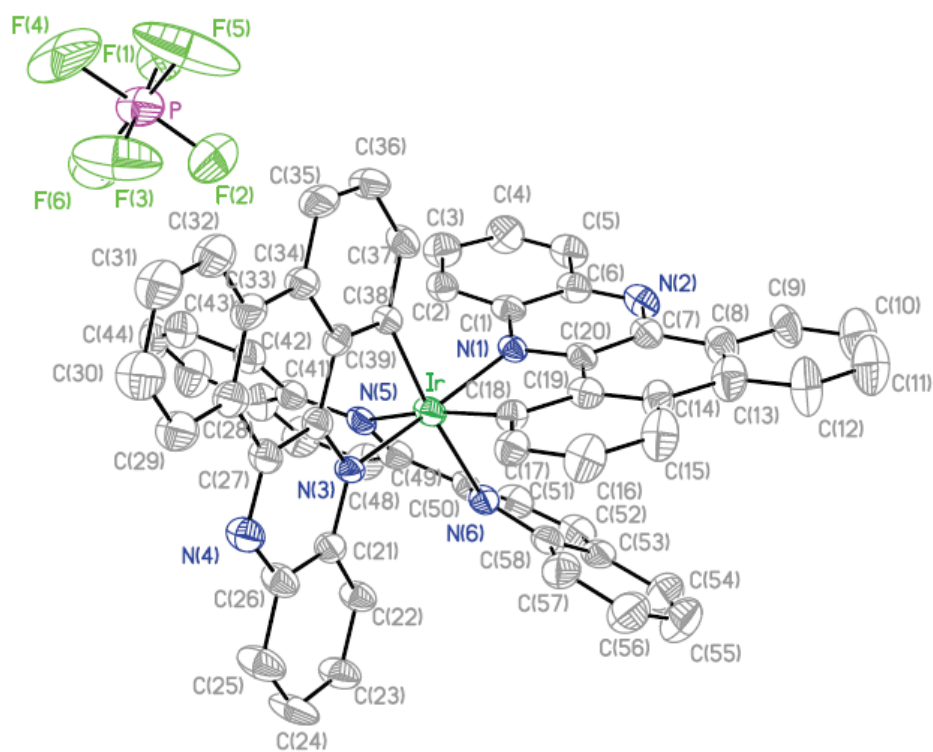

**Figure S1.** Crystal of complex **NIREx**. The hydrogen atoms are omitted for clarity.

**Table S1.** Crystal data of complex **NIREx**.

| Complex              | <b>NIREx (CCDC 1986267)</b>                                              |
|----------------------|--------------------------------------------------------------------------|
| Empirical formula    | C <sub>58</sub> H <sub>34</sub> F <sub>6</sub> Ir N <sub>6</sub> P       |
| Formula weight       | 1152.08                                                                  |
| Temperature          | 150(2) K                                                                 |
| Wavelength           | 0.71073 Å                                                                |
| Crystal system       | triclinic                                                                |
| Space group          | P -1                                                                     |
| Unit cell dimensions | a = 11.6607(18) Å<br>a = 75.403(5)°<br>b = 15.168(2) Å<br>b = 85.538(5)° |

---

|                                    |                                                              |
|------------------------------------|--------------------------------------------------------------|
|                                    | $c = 16.304(3) \text{ \AA}$                                  |
|                                    | $g = 79.408(5)^\circ$                                        |
| Volume                             | $2741.5(7) \text{ \AA}^3$                                    |
| Z                                  | 2                                                            |
| Density (calculated)               | $1.396 \text{ Mg/m}^3$                                       |
| Absorption coefficient             | $2.526 \text{ mm}^{-1}$                                      |
| F(000)                             | 1140                                                         |
| Crystal size                       | $0.420 \times 0.230 \times 0.010 \text{ mm}^3$               |
| Theta range for data collection    | $2.817 \text{ to } 28.080^\circ$                             |
| Index ranges                       | $-15 \leq h \leq 15, -20 \leq k \leq 19, -20 \leq l \leq 21$ |
| Reflections collected              | 51672                                                        |
| Independent reflections            | 13138 [R(int) = 0.1339]                                      |
| Completeness to theta =<br>25.242° | 99.8 %                                                       |
| Absorption correction              | Semi-empirical from equivalents                              |
| Max. and min. transmission         | 0.9281 and 0.5590                                            |
| Refinement method                  | Full-matrix least-squares on F <sup>2</sup>                  |
| Data / restraints / parameters     | 13138 / 0 / 649                                              |
| Goodness-of-fit on F <sup>2</sup>  | 0.991                                                        |
| Final R indices<br>[I > 2σ(I)]     | R1 = 0.0617, wR2 = 0.1453                                    |
| R indices (all data)               | R1 = 0.1200, wR2 = 0.1797                                    |
| Extinction coefficient             | n/a                                                          |
| Largest diff. peak and hole        | 2.844 and -3.396 e.Å <sup>-3</sup>                           |

---



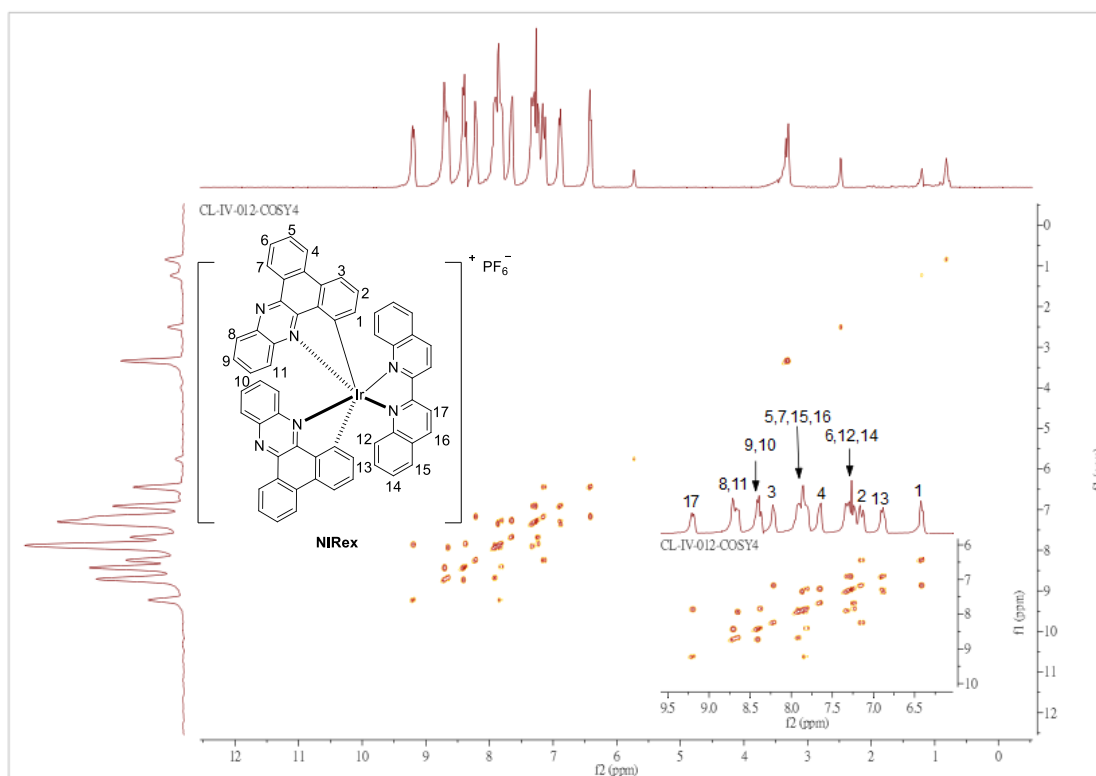

**Figure S4.**  $^1\text{H}$ - $^1\text{H}$  COSY spectrum (400 MHz, pulse width of 14.0) of complex **NIRex** in  $\text{CDCl}_3$  at 298 K, the inset is the expansion of the aromatic region.

Data:CL-IV-012

Comment:

Description:

Ionization Mode:ESI+

History:Average(MS[1] 0.37..0.40)

Acquired:3/5/2020 11:53:57 AM

Operator:AccuTOF

m/z Calibration File:20200218-TFANA\_...

Created:3/5/2020 4:08:56 PM

Created by:AccuTOF

Charge number:1

Tolerance:200.00[ppm], 200.00 .. 200....

Unsaturation Number:-150.0 .. 200.0 (...)

Element: $^{12}\text{C}$ :58 .. 58,  $^1\text{H}$ :33 .. 35,  $^{19}\text{F}$ :6 .. 6,  $^{191}\text{Ir}$ :0 .. 1,  $^{193}\text{Ir}$ :0 .. 1,  $^{14}\text{N}$ :6 .. 6,  $^{23}\text{Na}$ :0 .. 2,  $^{31}\text{P}$ :0 .. 10,  $^{32}\text{S}$ :1 .. 1

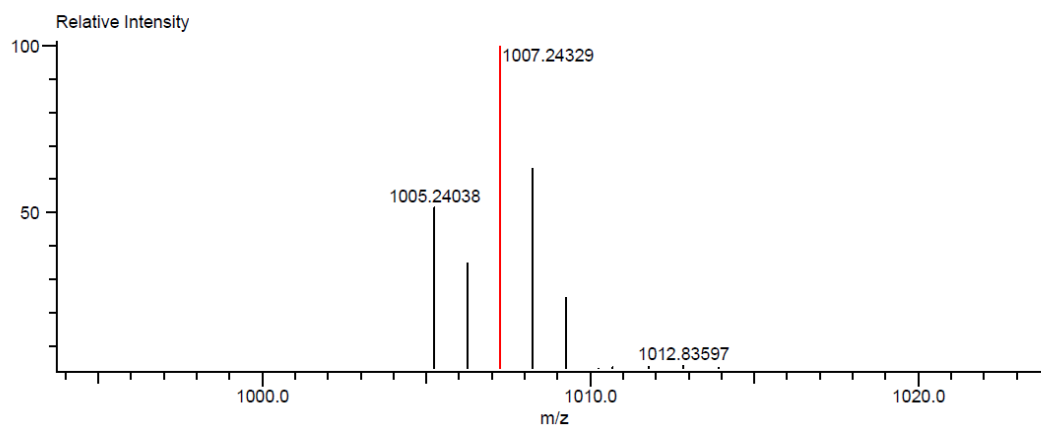

**Figure S5.** HRMS-ESI $^+$  spectrum of **NIRex**.

**Table S2.** Calculated singlet and triplet states for cationic iridium complex **NIRex** by TD-DFT approach.

| Complex      | States         | eV <sup>(a)</sup><br>(nm) | $f^{(b)}$ | Monoexcitations <sup>(c)</sup>                                                                                                          | Ground state dipole moment [D] |
|--------------|----------------|---------------------------|-----------|-----------------------------------------------------------------------------------------------------------------------------------------|--------------------------------|
| <b>NIRex</b> | S <sub>1</sub> | 2.06<br>(601)             | 0.0066    | H - 4 → L (1.3%)<br>H - 2 → L (1.2%)<br>H - 1 → L (6.6%)<br>H → L (40%)<br>H - 4 → L (8.0%)<br>H - 4 → L + 1 (4.2%)<br>H - 2 → L (3.3%) | 5.9337                         |
|              | T <sub>1</sub> | 1.50<br>(826)             | 0.0000    | H - 2 → L + 1 (1.5%)<br>H - 1 → L (4.4%)<br>H - 1 → L + 1 (1.8%)<br>H → L (17%)<br>H → L + 1 (6.7%)                                     |                                |

(a) Calculated vertical excitation energies. (b)  $f$  = oscillator strength. (c) H and L denote the HOMO and LUMO, respectively; data in parentheses are the contributions of the excitation.

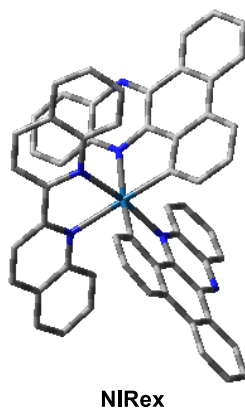

**Figure S6.** Ground state geometries of complex **NIRex** obtain at B3LYB/6-31G(d)/LanL2DZ level of theory. Hydrogen atoms are omitted for clarity.

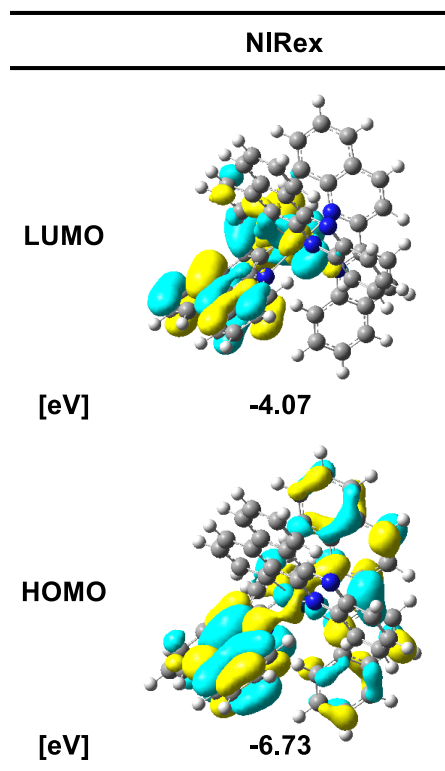

**Figure S7.** Electron density distribution pattern of the frontier molecular orbitals for complex **NIRex**, obtained at B3LYP/6-31G(d,p)/LanL2DZ level of theory.

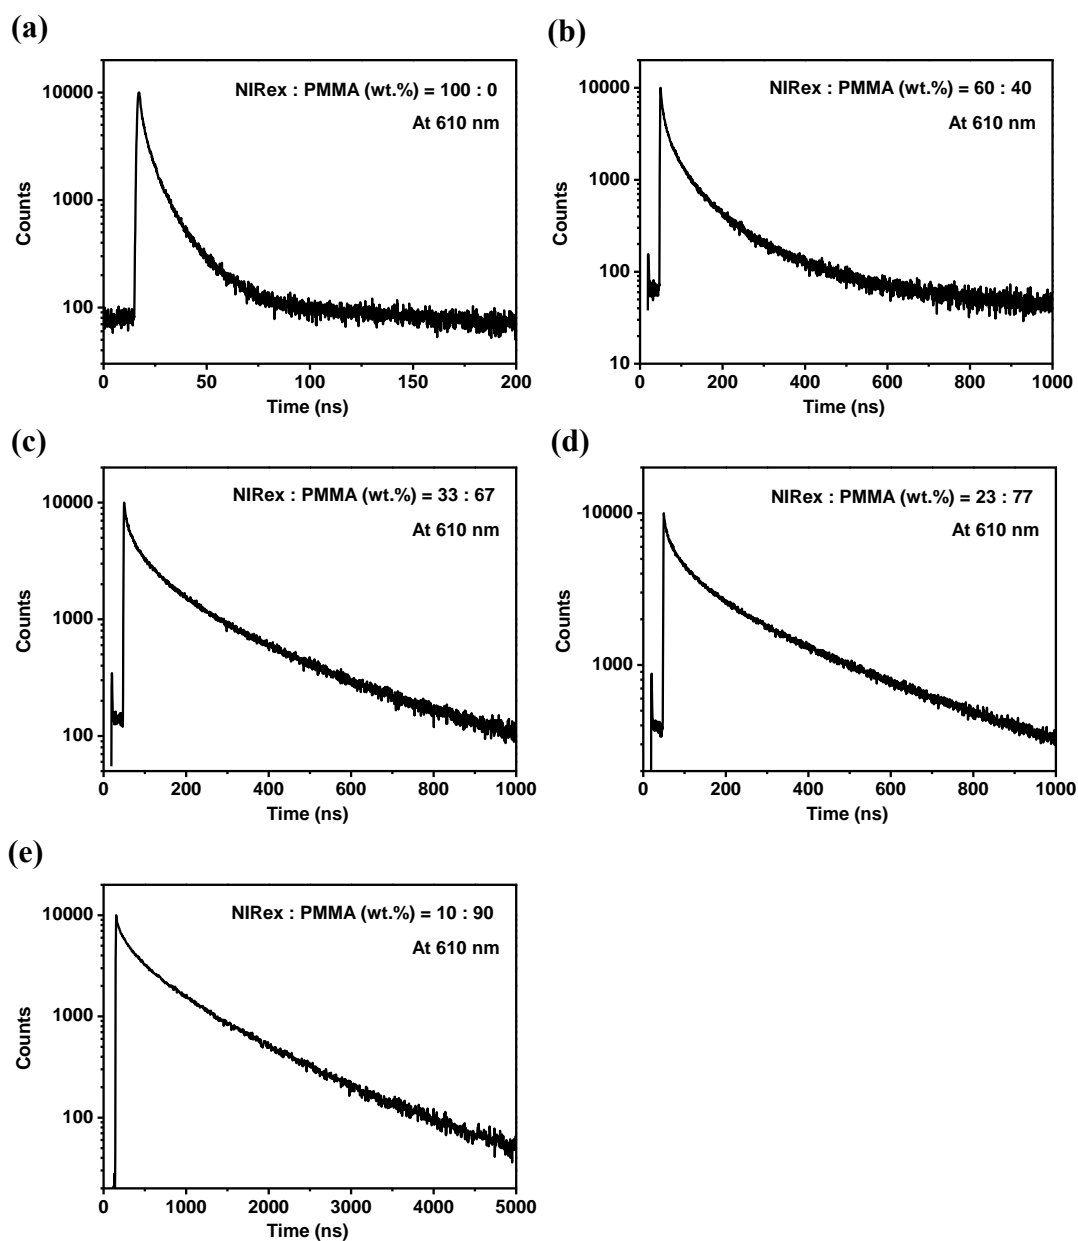

**Figure S8.** Excited-state lifetimes at 610 nm of thin films with weight ratios of complex NIRex and PMMA of (a) 100 : 0, (b) 60 : 40, (c) 33 : 67, (d) 23 : 77 and (e) 10 : 90.



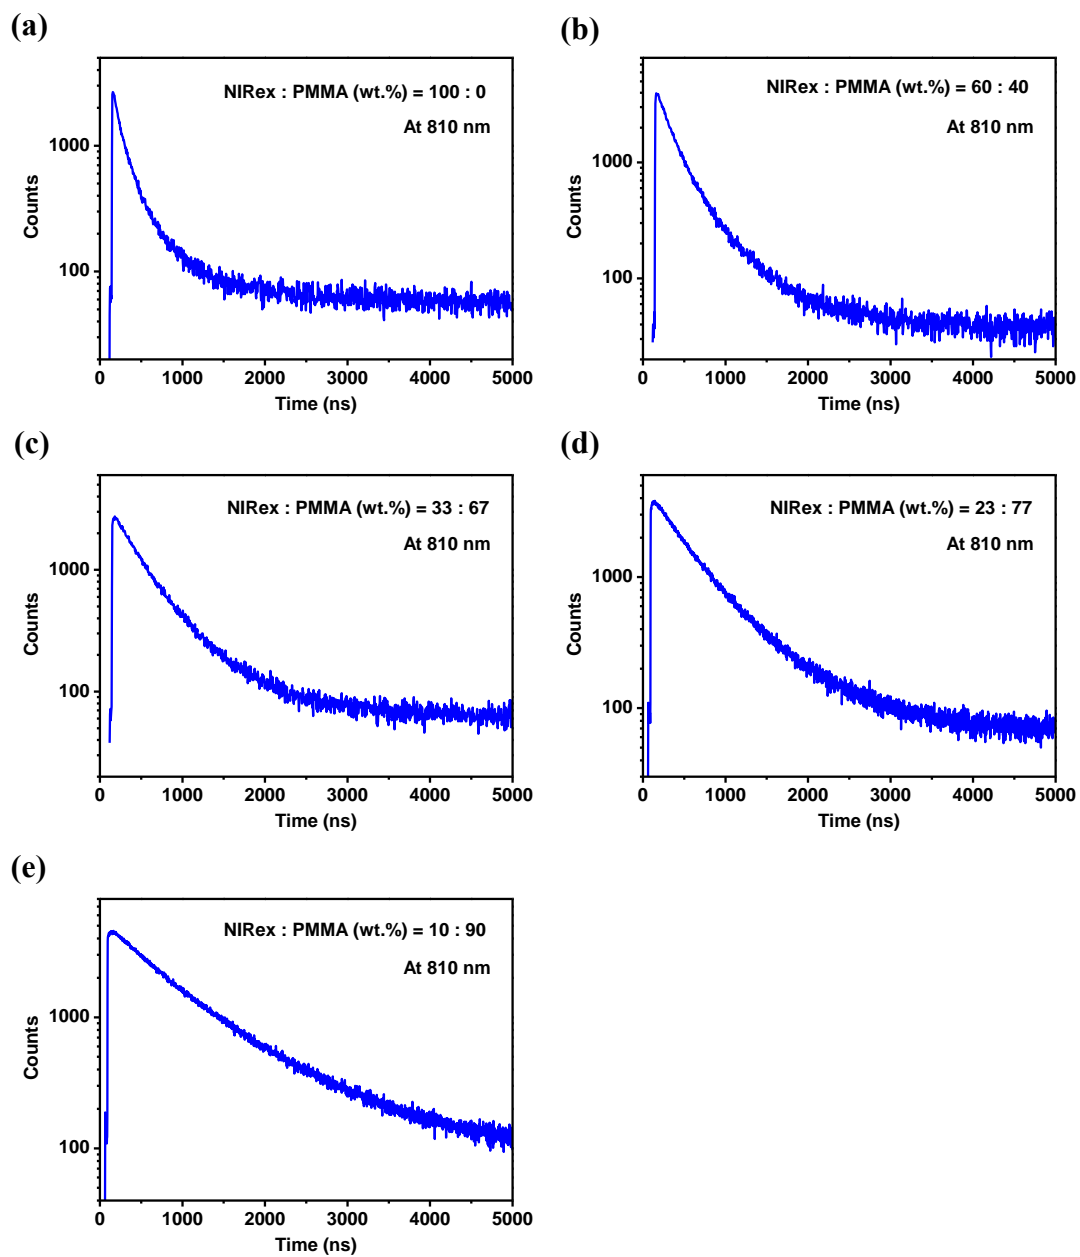

**Figure S9.** Excited-state lifetimes at 810 nm of thin films with weight ratios of complex NIRex and PMMA of (a) 100 : 0, (b) 60 : 40, (c) 33 : 67, (d) 23 : 77 and (e) 10 : 90.

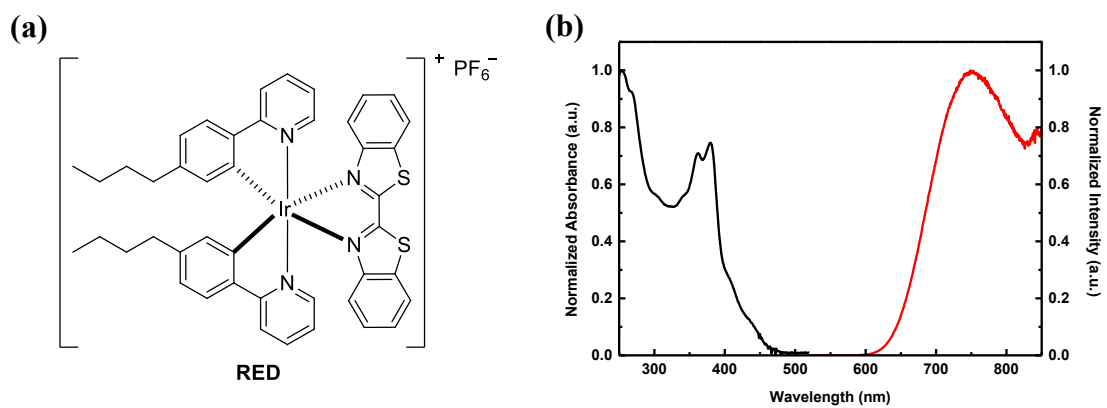

**Figure S10.** (a) Structure of complex **RED** for comparison. (b) Absorption (left axis) and PL spectra (right axis) of complex **RED** in MeCN solution ( $1.0 \times 10^{-5}$  M,  $\lambda_{\text{ex}} = 385$  nm).

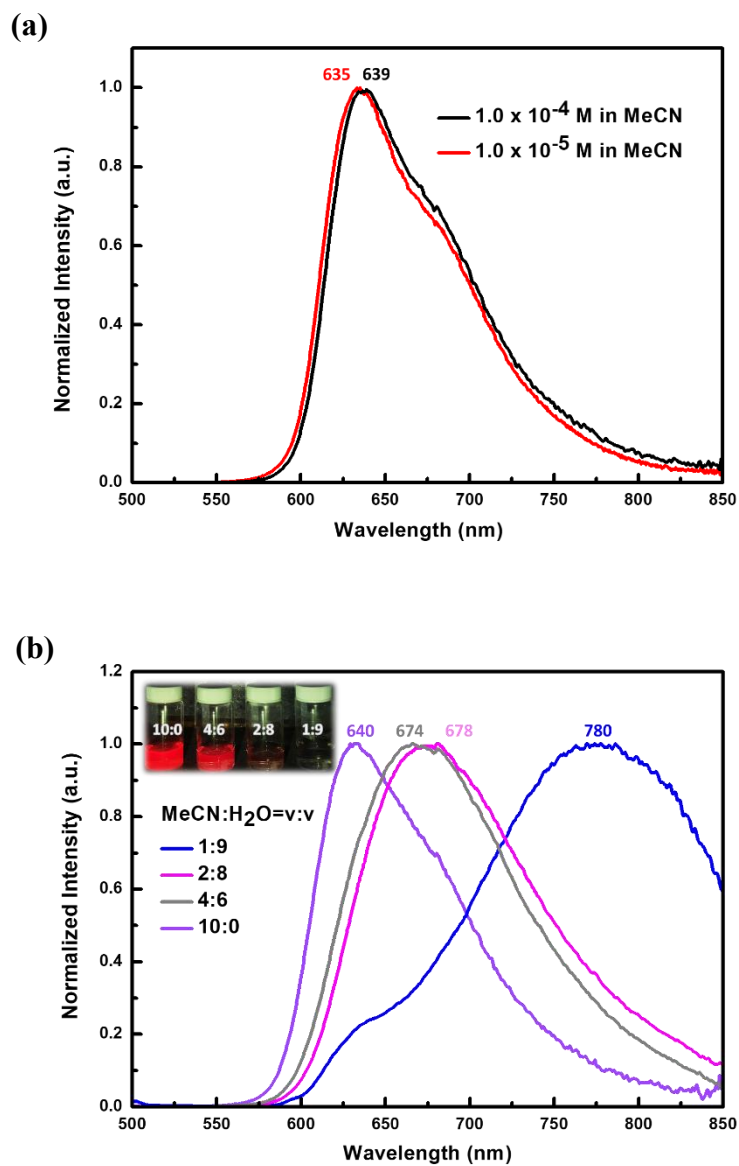

**Figure S11.** (a) Concentration-dependent PL spectra; (b) PL spectra of complex **NIREx** in MeCN with the increasing of water content (*ca.*  $1.0 \times 10^{-4}$  M, water fraction from 0 to 90% by volume).

**Table S3.** Summary of the characteristics of NIR LECs reported in literatures

| Emissive material                                                   | $\lambda_{\max, \text{EL}}$<br>[nm] <sup>a</sup> | $L_{\max}$<br>[ $\mu\text{W cm}^{-2}$ ] <sup>b</sup> | $\eta_{\text{ext, max}}$<br>[%] <sup>c</sup> | $\eta_{\text{P, max}}$<br>[mW W <sup>-1</sup> ] <sup>d</sup> | Ref. |
|---------------------------------------------------------------------|--------------------------------------------------|------------------------------------------------------|----------------------------------------------|--------------------------------------------------------------|------|
| [Ir(ppy) <sub>2</sub> (dasb)][PF <sub>6</sub> ]:DOTCI (1.0 wt.%)    | 729                                              | 2.42                                                 | 0.93                                         | 6.43                                                         | 1    |
| [Ir(ppy) <sub>2</sub> (dasb)][PF <sub>6</sub> ]:DTTCI (1.0 wt.%)    | 805                                              | 8.19                                                 | 1.49                                         | 10.16                                                        | 1    |
| dye H: dye G (0.1 wt.%)                                             | 706                                              | 170                                                  | 0.44                                         | -                                                            | 2    |
| polymers with dinuclear Ru complexes                                | 790                                              | 0.016 <sup>e</sup>                                   | 5.4 x 10 <sup>-6e</sup>                      | -                                                            | 3    |
| PIDTT-TQ                                                            | 705                                              | 129                                                  | 0.1                                          | 0.48                                                         | 4    |
| PBDTTBTzT                                                           | 723                                              | 169                                                  | 0.135                                        | -                                                            | 5    |
| PIDTT-SBS                                                           | 725                                              | 263                                                  | 0.214                                        | -                                                            | 6    |
| PBDTSi-BDD:ZnP(TDPP) <sub>4</sub> (5 wt.%)                          | 900                                              | 36                                                   | 0.028                                        | -                                                            | 7    |
| [Os(phen) <sub>3</sub> ][PF <sub>6</sub> ] <sub>2</sub>             | 710                                              | -                                                    | 0.08 <sup>e</sup>                            | -                                                            | 8    |
| [Ru(tpy)(tpy-O <sub>2</sub> Et)][PF <sub>6</sub> ] <sub>2</sub>     | 706                                              | -                                                    | -                                            | -                                                            | 9    |
| Ru complex (3)                                                      | 780                                              | 30.8 <sup>e</sup>                                    | 0.013                                        | -                                                            | 10   |
| Ru complex (4)                                                      | 880                                              | 5.7 <sup>e</sup>                                     | 0.075                                        | -                                                            | 10   |
| Ru complex (5)                                                      | 900                                              | 2.5 <sup>e</sup>                                     | 0.006                                        | -                                                            | 10   |
| Ru complex (6)                                                      | 945                                              | 3.1 <sup>e</sup>                                     | 0.030                                        | -                                                            | 10   |
| Ru complex (7)                                                      | 1040                                             | -                                                    | -                                            | -                                                            | 10   |
| [Ru(tpy-CO <sub>2</sub> Et)(trz)][PF <sub>6</sub> ] <sub>2</sub>    | 725                                              | -                                                    | 0.005                                        | -                                                            | 11   |
| heteroleptic bis(tridentate) Ru complexes                           | 722                                              | -                                                    | 0.028                                        | -                                                            | 12   |
| Ru(dtb-bpy) <sub>3</sub> (PF <sub>6</sub> ) <sub>2</sub> : DOTCI (1 | 739                                              | 14.9                                                 | 2.75                                         | 9.37                                                         | 13   |

|                                                                        |     |                  |       |       |           |
|------------------------------------------------------------------------|-----|------------------|-------|-------|-----------|
| wt.%)                                                                  |     |                  |       |       |           |
| phenanthroimidazole Ru<br>complex ( <b>NE04</b> )                      | 700 | -                | 1.367 | -     | 14        |
| [Ir(ppy) <sub>2</sub> (2,2'-<br>bibenzo[d]thiazole)][PF <sub>6</sub> ] | 705 | 260 <sup>e</sup> | 0.37  | -     | 15        |
| Ru(dtb-bpy) <sub>3</sub> (PF <sub>6</sub> ) <sub>2</sub>               | 718 | 33.6             | 0.64  | 3.76  | 16        |
| Ir complex ( <b>NIR3</b> )                                             | 882 | 44.1             | 0.036 | 0.122 | 17        |
| Ir complex ( <b>NIR6</b> )                                             | 790 | 56.9             | 0.05  | 0.181 | 17        |
| complex <b>RED</b> : complex <b>NIR3</b><br>(20 wt.%)                  | 778 | 12.6             | 0.116 | 0.747 | 17        |
| complex <b>RED</b> : complex <b>NIR6</b><br>(20 wt.%)                  | 778 | 13.6             | 0.093 | 0.631 | 17        |
| Ru complex ( <b>Bn2</b> )                                              | 706 | -                | 0.93  | -     | 18        |
| complex <b>NIRex</b>                                                   | 860 | 143              | 0.26  | 0.93  | this work |
| complex <b>RED</b> : complex<br><b>NIRex</b> (60 wt.%)                 | 824 | 164              | 0.39  | 1.46  | this work |
| complex <b>RED</b> : complex<br><b>NIRex</b> (40 wt.%)                 | 809 | 303              | 0.57  | 2.20  | this work |
| complex <b>RED</b> : complex<br><b>NIRex</b> (20 wt.%)                 | 744 | 637              | 0.82  | 3.29  | this work |

---

<sup>a</sup> EL peak wavelength. <sup>b</sup> Maximal light output power. <sup>c</sup> Maximal external quantum efficiency. <sup>d</sup> Maximal power efficiency. <sup>e</sup> Estimated from the reported data.

## Abbreviations

1. ppy: 2-phenylpyridine
2. dasb: 4,5-diaza-9,9'-spirobifluorene
3. DOTCI: 3,3'-diethyl-2,2'-oxathiacarbocyanine iodide
4. DTTCI: 3,3'-diethylthiatricarbocyanine iodide
5. dye H: 1-ethyl-2-[3-(1-ethyl-1,3-dihydro-3,3-dimethyl-2H-indol-2-ylidene)-propenyl]-3,3-dimethyl-3H-indolium hexafluorophosphate
6. dye G: 1-butyl-2-[5-(1-butyl-1,3-dihydro-3,3-dimethyl-2H-indol-2-ylidene)-penta-1,3-dienyl]-3,3-dimethyl-3H-indolium hexafluorophosphate
7. PIDTT-TQ: poly[indacenodithieno[3,2-b]thiophene-2,8-diyl-alt-2,3-bis(3-(octyloxy)phenyl)-5,8-di(thiophen-2-yl)quinoxaline-5,5'-diyl]
8. PBDTTBTzT: polybenzodithiophene 4,7-bis(5-bromothiophen-2-yl)-2-(2-hexyldecyl)-2H-benzo[d][1,2,3]triazole
9. PIDTT-SBS: poly(indacenodithieno[3,2-b]thiophene) 4,7-Bis(4,4-bis(2-ethylhexyl)-4H-silolo[3,2-b:4,5-b']dithiophen-2-yl)benzo[c][1,2,5]-thiadiazole
10. PBDTSi-BDD: poly[1,3-bis(2-ethylhexyl)-5-(5-(6-methyl-4,8-bis(5-tributylsilyl)thiophen-2-yl)benzo[1,2-b:4,5-b']dithiophen-2-yl)thiophen-2-yl)-7-(5-methylthiophen-2-yl)-4H,8H-benzo[1,2-c:4,5-c']dithiophene-4,8-dione]
11. TDPP: 2,5-thienyl diketopyrrolopyrrole
12. phen: 1,10-phenanthroline
13. tpy: terpyridine
14. trz: 2-phenyl-4,6-dipyridin-2-yl-1,3,5-triazine
15. dtb-bpy is 4,4'-ditertbutyl-2,2'-bipyridine

## References

1. C.-C. Ho, H.-F. Chen, Y.-C. Ho, C.-T. Liao, H.-C. Su, K.-T. Wong, *Phys. Chem. Chem. Phys.*, 2011, **13**, 17729.
2. A. Pertegás, D. Tordera, J. J. Serrano-Pérez, E. Ortí, H. J. Bolink, *J. Am. Chem. Soc.*, 2013, **135**, 18008.
3. S. Wang, X. Li, S. Xun, X. Wan, Z. Y. Wang, *Macromolecules*, 2006, **39**, 7502.
4. S. Tang, P. Murto, X. Xu, C. Larsen, E. Wang, L. Edman, *Chem. Mater.*, 2017, **29**, 7750.
5. W. Xiong, S. Tang, P. Murto, W. Zhu, L. Edman, E. Wang, *Adv. Opt. Mater.*, 2019, **7**, 1900280.
6. S. Tang, P. Murto, J. Wang, C. Larsen, M. R. Andersson, E. Wang, L. Edman, *Adv. Opt. Mater.*, 2019, **7**, 1900451.
7. M. Mone, S. Tang, P. Murto, B. A. Abdulahi, C. Larsen, J. Wang, W. Mammo, L. Edman, E. Wang, *Chem. Mater.*, 2019, **31**, 9721.
8. A. R. Hosseini, C. Y. Koh, J. D. Slinker, S. Flores-Torres, H. D. Abruña, G. G. Malliaras, *Chem. Mater.*, 2005, **17**, 6114.
9. H. J. Bolink, L. Cappelli, E. Coronado, P. Gaviña, *Inorg. Chem.*, 2005, **44**, 5966.
10. S. Xun, J. Zhang, X. Li, D. Ma, Z. Y. Wang, *Synth. Met.*, 2008, **158**, 484.
11. H. J. Bolink, E. Coronado, R. D. Costa, P. Gaviña, E. Ortí, S. Tatay, *Inorg. Chem.*, 2009, **48**, 3907.
12. A. Breivogel, M. Park, D. Lee, S. Klassen, A. Kühnle, C. Lee, K. Char, K. Heinze, *Eur. J. Inorg. Chem.*, 2014, **2014**, 288.
13. C.-L. Lee, C.-Y. Cheng, H.-C. Su, *Org. Electron.*, 2014, **15**, 711.
14. B. N. Bideh, C. Roldán-Carmona, H. Shahroosvand, M. K. Nazeeruddin, *J. Mater. Chem. C*, 2016, **4**, 9674.
15. A. K. Pal, D. B. Cordes, A. M. Z. Slawin, C. Momblona, A. Pertegás, E. Ortí, H. J.

- Bolink, E. Zysman-Colman, *RSC Adv.*, 2017, **7**, 31833.
16. J.-H. Hsu, H.-C. Su, *Phys. Chem. Chem. Phys.*, 2016, **18**, 5034.
17. G.-Y. Chen, B.-R. Chang, T.-A. Shih, C.-H. Lin, C.-L. Lo, Y.-Z. Chen, Y.-X. Liu, Y.-R. Li, J.-T. Guo, C.-W. Lu, Z.-P. Yang, H.-C. Su, *Chem.–Eur. J.*, 2019, **25**, 5489.
18. B. Nemati Bideh, H. Shahroosvand, *New J. Chem.* **2020**, *44*, 1881.
